# Supplementary material for: Characterization of histopathology and gene-expression profiles of synovitis in early rheumatoid arthritis using targeted biopsy specimens
Source: PubMed Central journal article supplement (PMC1175033; doi:10.1186/ar1751), 2005-04-25
Supplement: ar1751-S1.pdf [file ar1751-S1.pdf]

Genes

Samples

E-03  
E-02  
E-08  
E-05  
E-07  
E-11  
E-04  
E-01  
E-10  
E-06  
E-09  
E-12

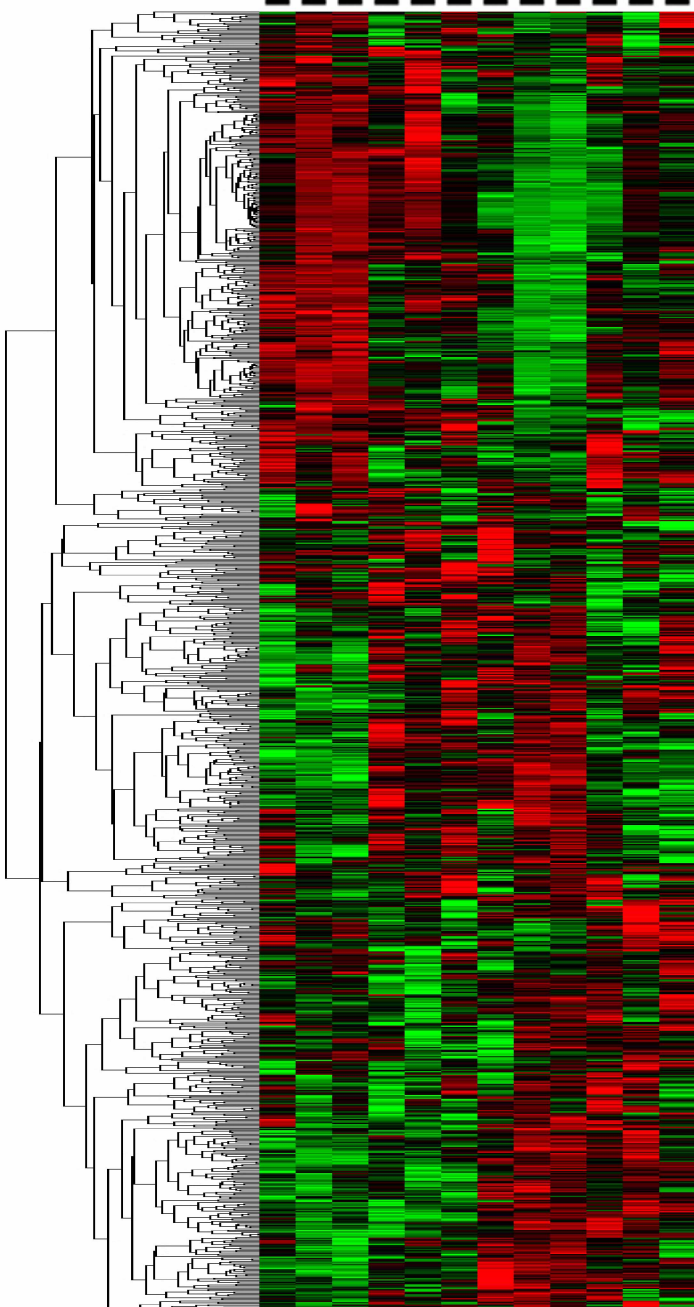

Up-regulation  
Down-regulation
