# Supplementary material for: Characterization of histopathology and gene-expression profiles of synovitis in early rheumatoid arthritis using targeted biopsy specimens
Source: PubMed Central journal article supplement (PMC1175033; doi:10.1186/ar1751), 2005-04-25

## A. Signal intensity in microarray

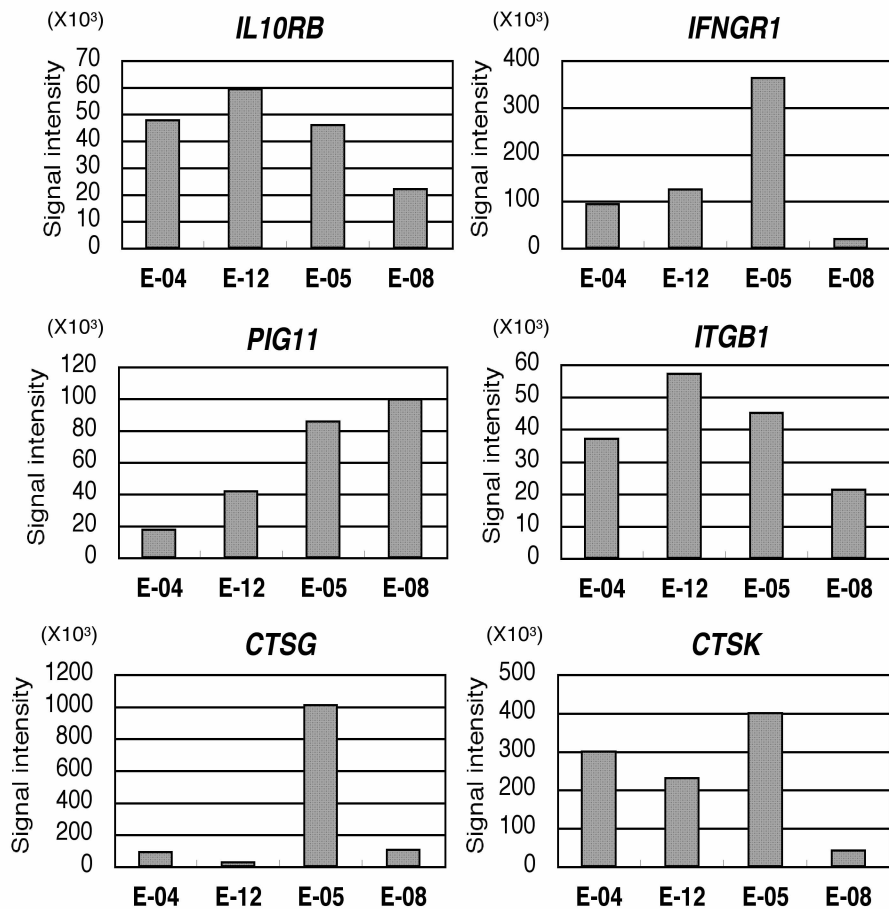

## B. RT-PCR

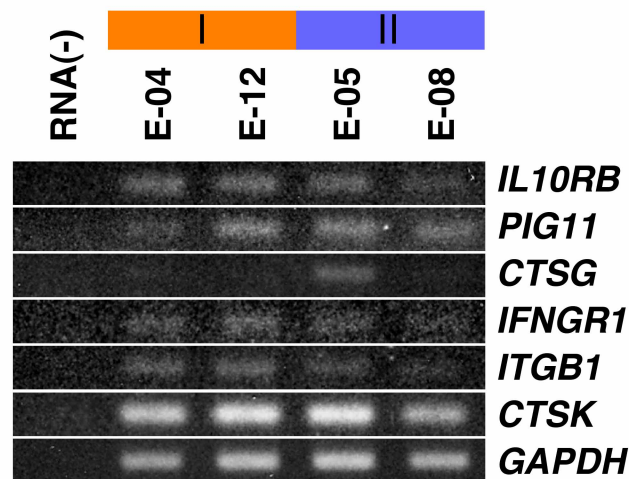

Supplement: ar1751-S2.pdf [file ar1751-S2.pdf]
