# Supplementary material for: Characterization of histopathology and gene-expression profiles of synovitis in early rheumatoid arthritis using targeted biopsy specimens
Source: PubMed Central journal article supplement (PMC1175033; doi:10.1186/ar1751), 2005-04-25
Supplement: ar1751-S3.pdf [file ar1751-S3.pdf]

Cutoff; 10000  
Euclidean distance  
Fig.3

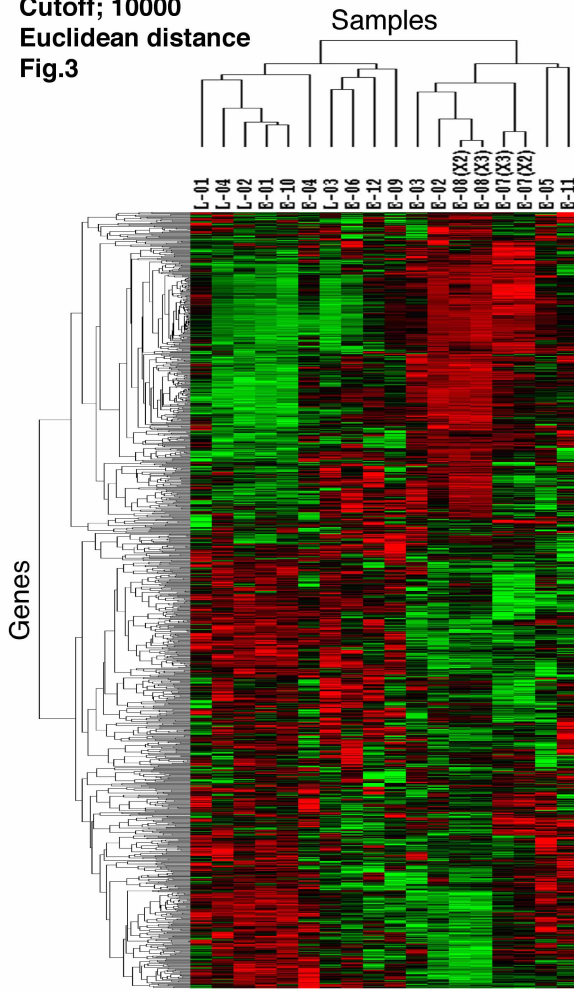

Cutoff; 10000  
Pearson correlation

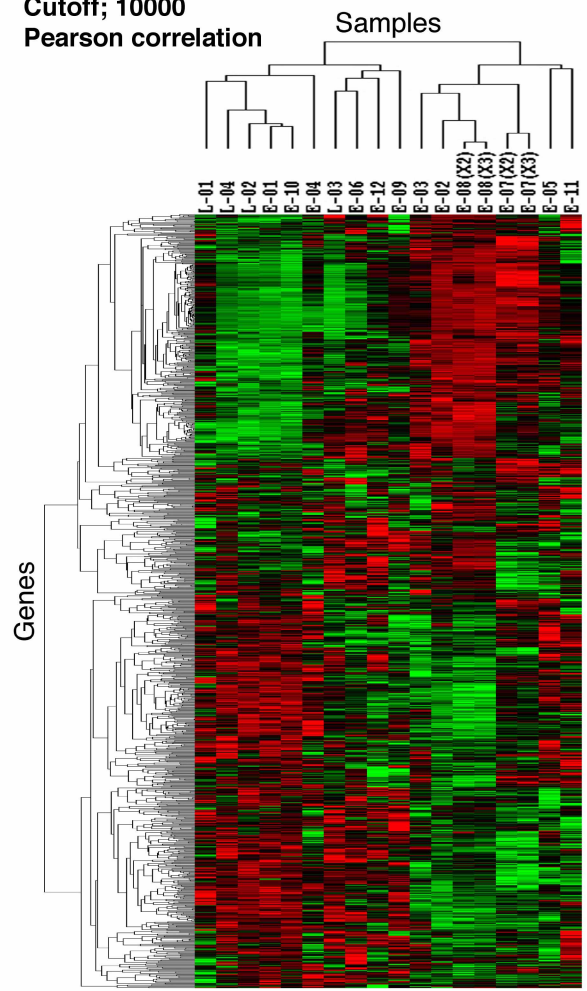

Cutoff; 20000  
Euclidean distance

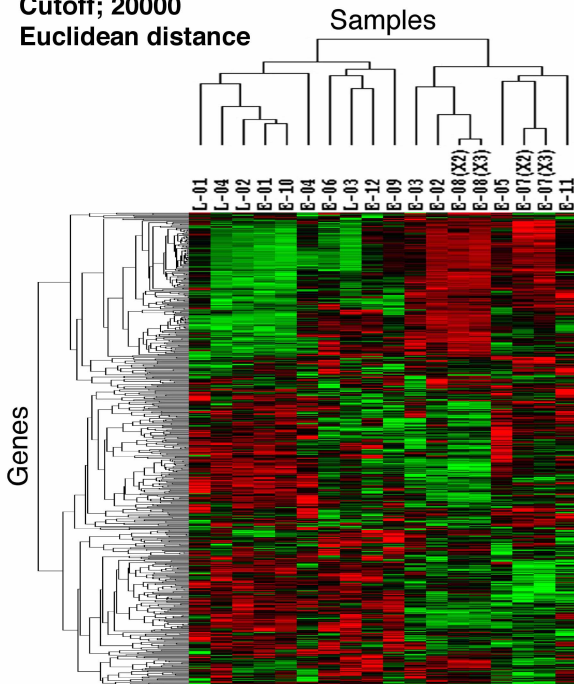

Cutoff; 20000  
Pearson correlation

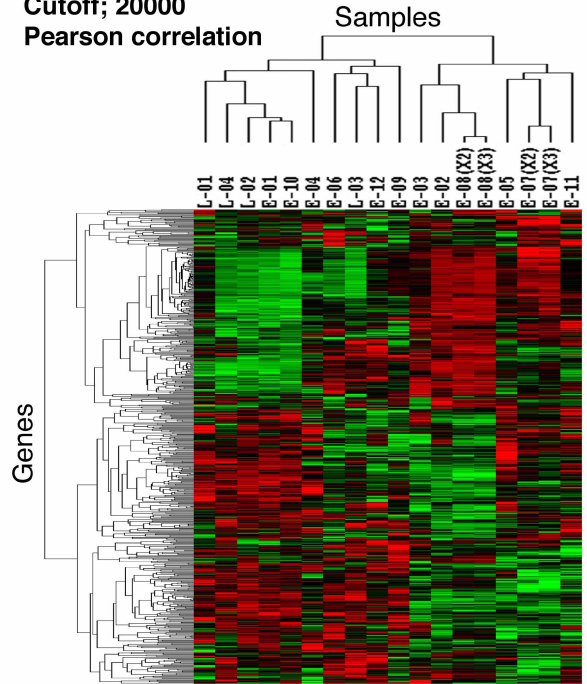

■ Up-regulation  
■ Down-regulation
